# Supplementary material
Source: Springer Nature journal article supplement (https://www.springermedizin.de/resource/supplementary/12943_2008_378_MOESM6_ESM.pdf/9554054)

### Repressed Genes, Biological Pathways

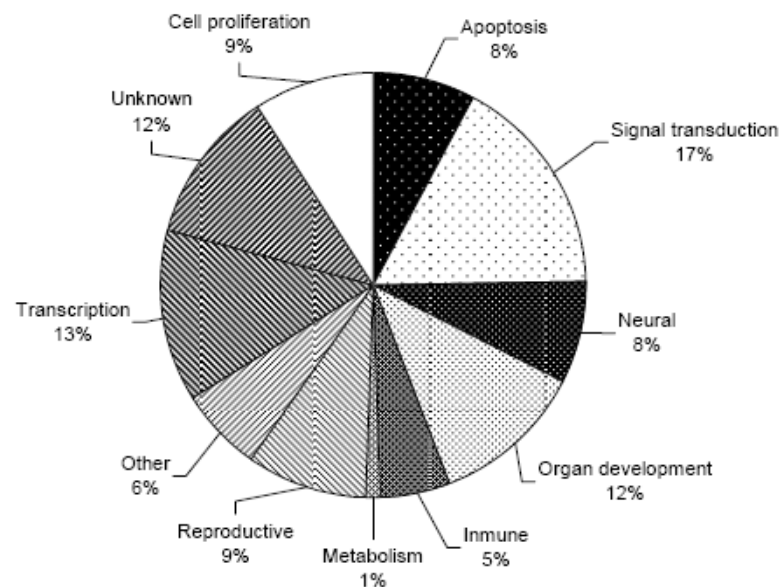

### Induced Genes, Biological Pathway

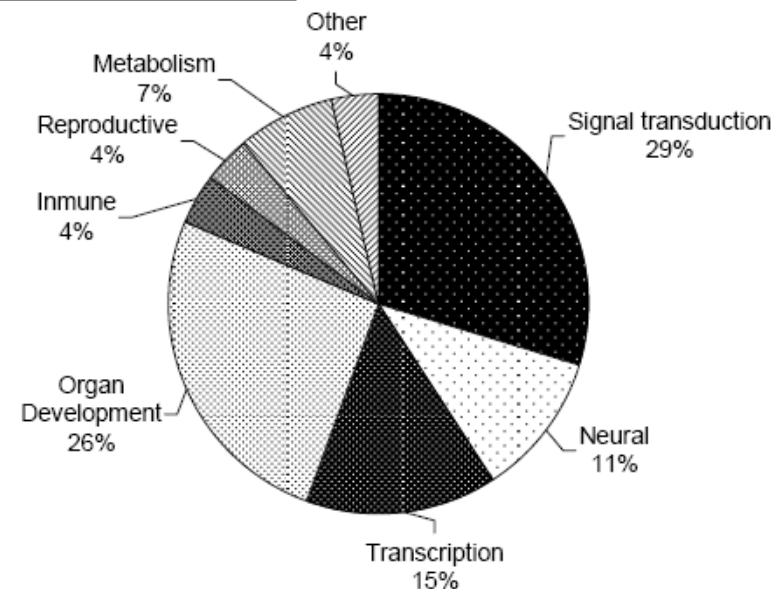

### Repressed Genes, Biochemical Pathways

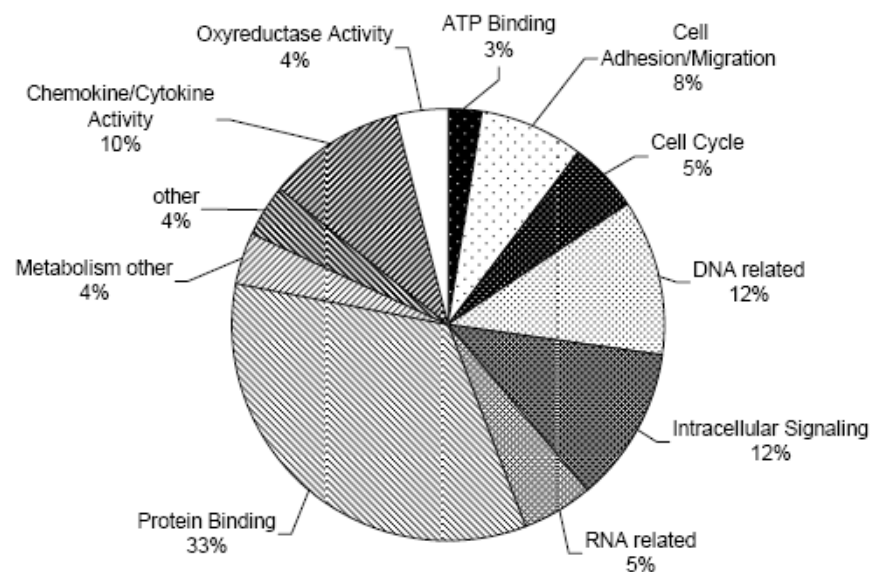

### Induced Genes, Biochemical Pathway

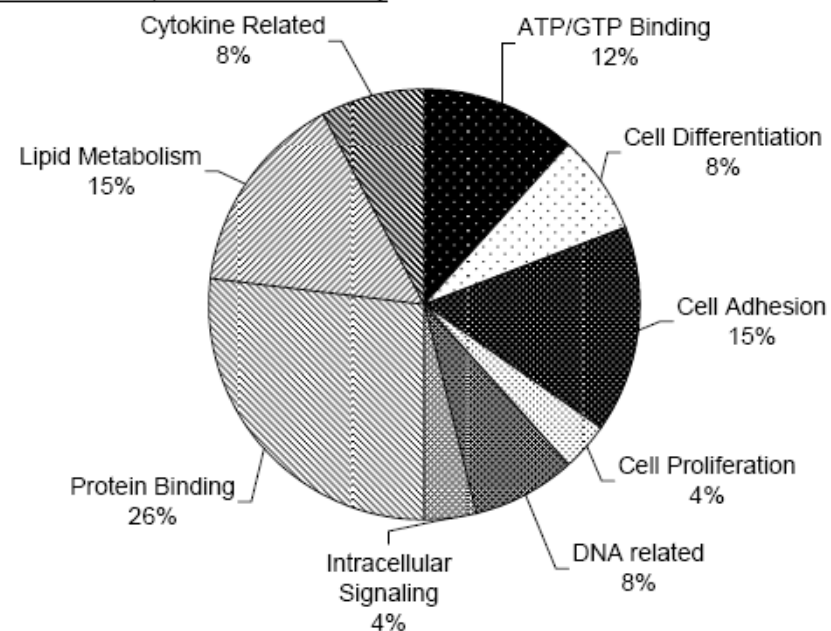

Supplement: MOESM6 [file 9554054]
